# Supplementary material for: Reduction of Mature B Cells and Immunoglobulins Results in Increased Trabecular Bone
Source: PubMed Central journal article supplement (PMC9465004; doi:10.1002/jbm4.10670), 2022-08-30

# Supplementary Figure 1

## Wild type

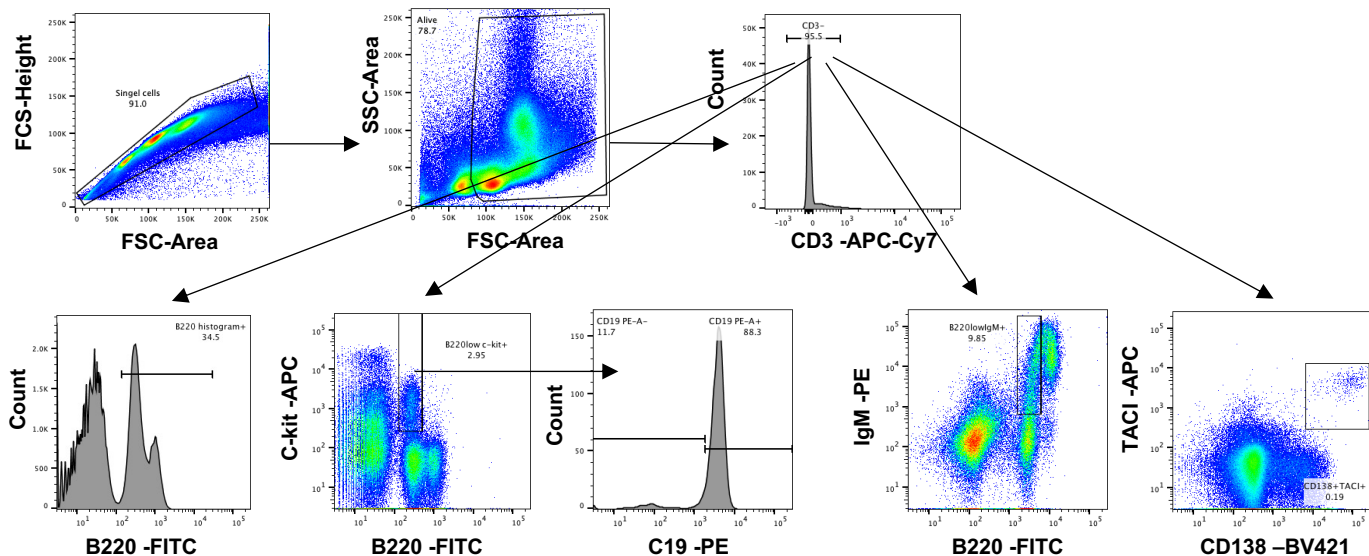

## muMT

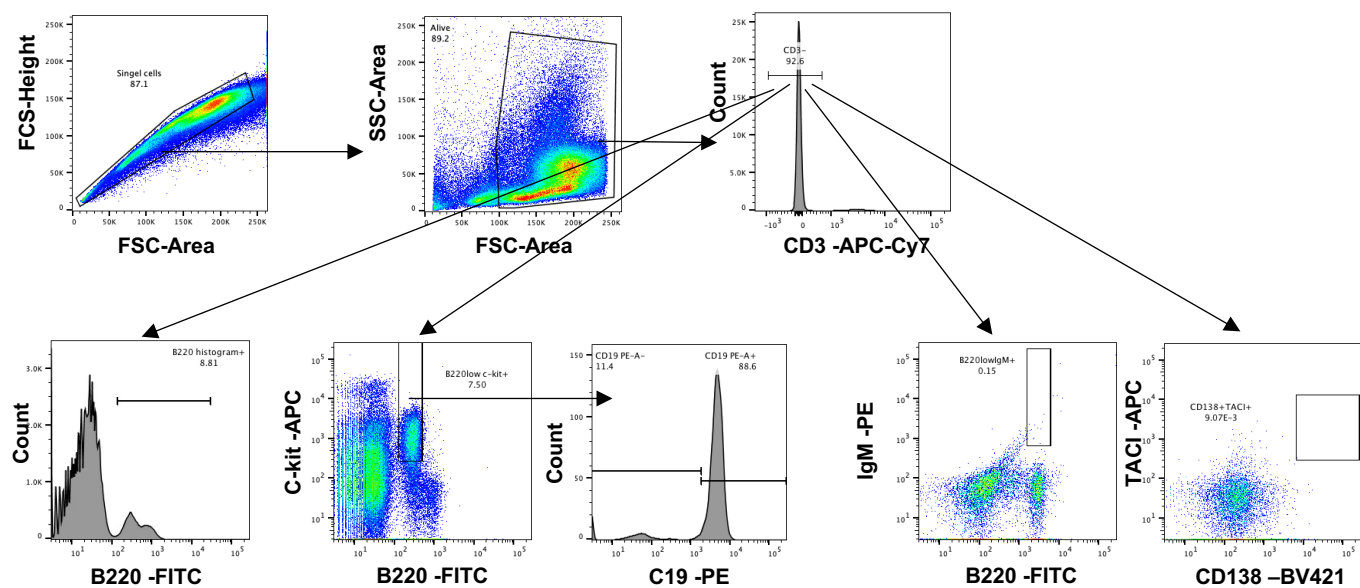

Supplement: JBM4-6-e10670-s004.pdf [file JBM4-6-e10670-s004.pdf]
